# Supplementary material for: In situ growth of Cu-doped MoS 2 thin films via a laser-induced technique: efficient P-type doping and effective enhancement of the FET device performance
Source: Royal Society of Chemistry journal article supplement (doi:10.1039/d4tc05131a), 2025-01-01
Supplement: d4tc05131a1.pdf [file d4tc05131a1.pdf]

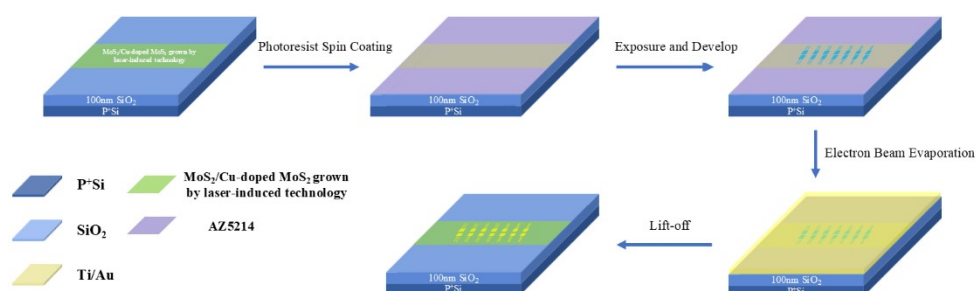

Figure S1. The process flow chart of MoS<sub>2</sub>/Cu-doped MoS<sub>2</sub> FETs

The device fabrication process is shown in Figure S1. The electrode patterns for the laser-synthesized thin films were fabricated using photolithography, which includes the steps of spin-coating the photoresist, exposure, and development. The electrodes were then deposited using electron beam evaporation (EBE). Finally, the photoresist was removed to complete the fabrication of the FET device.

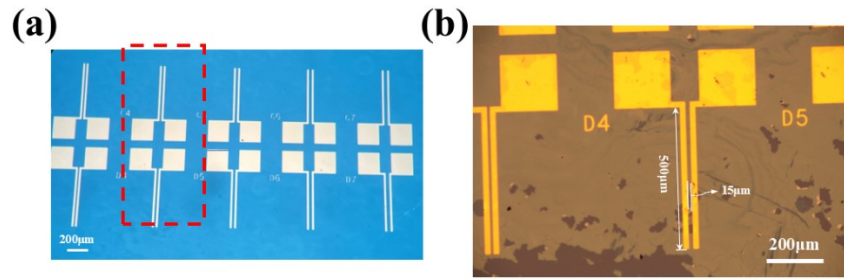

Figure S2. (a) Optical microscopy image of the fabricated FET, (b) optical microscopy image of the fabricated electrodes

The optical microscopy image of the fabricated devices is shown in Figure S2. We selected the C<sub>4</sub>/D<sub>4</sub> electrode pair for I-V testing, with specific dimensions of W = 15 μm and L = 500 μm.

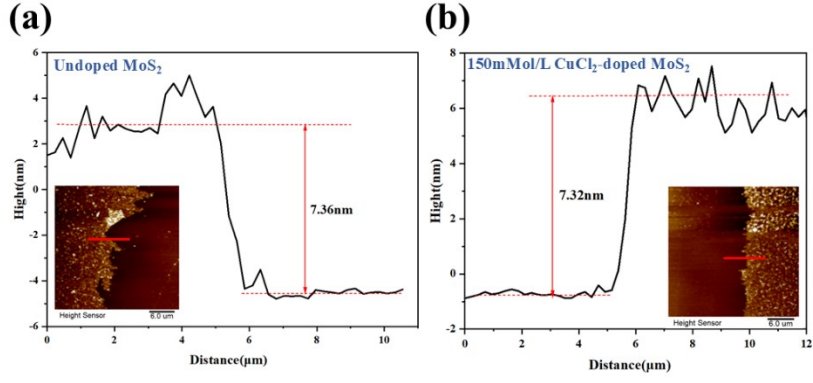

Figure S3. AFM characterization of film thickness:(a) thickness of undoped MoS<sub>2</sub> film,  
(b)thickness of 150 mMol/L CuCl<sub>2</sub>-doped MoS<sub>2</sub> film

AFM measurements were conducted to provide thickness information for the films, as shown in Figure S3. Both undoped MoS<sub>2</sub> and Cu-doped MoS<sub>2</sub> films were approximately 7 nm thick. The MoS<sub>2</sub> films synthesized via pulsed laser technology were multilayered( $\sim$ 11-layer).

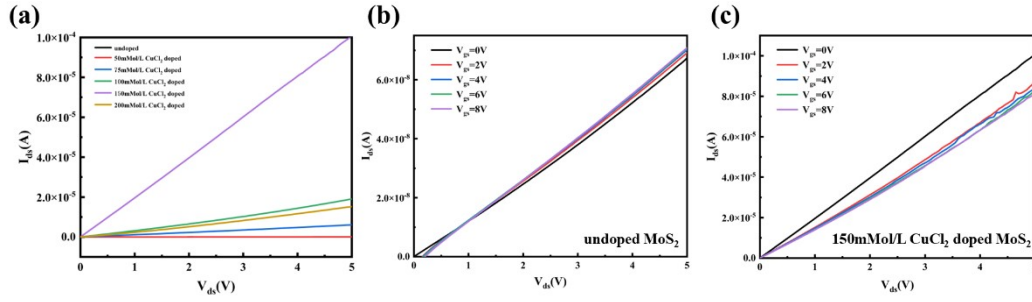

Figure S4. (a) Output characteristic curves at  $V_{gs}=0V$  for different  $CuCl_2$  doping concentrations, (b) output characteristic curve of undoped MoS<sub>2</sub> FET, (c) output characteristic curve of 150 mMol/L  $CuCl_2$ -doped MoS<sub>2</sub> FET

The output characteristic curves of undoped MoS<sub>2</sub> FETs and Cu-doped MoS<sub>2</sub> FETs is shown in Figure S4. Figure S4(a) has plotted the output curves of MoS<sub>2</sub> FETs with different Cu doping concentrations at  $V_{gs}=0V$ . It can be observed that with 150 mMol/L  $CuCl_2$  doping, the current increases by at least two orders of magnitude, indicating an enhancement in the film's electrical conductivity.
